# Supplementary material
Source: PubMed Central journal article supplement (PMC7366529)
Supplement: IJMR-151-200_Suppl2.pdf [file IJMR-151-200_Suppl2.pdf]

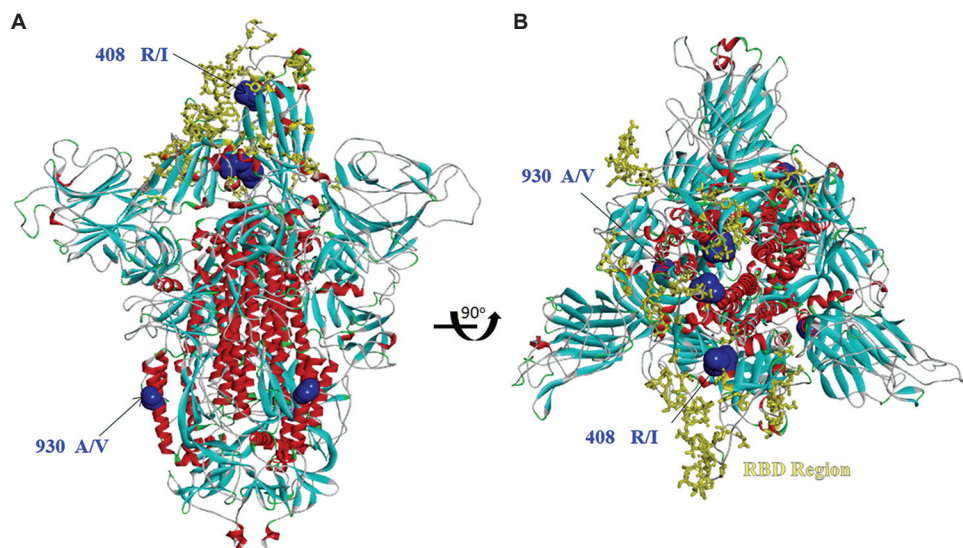

**Supplementary Fig. 1.** Receptor-binding domain and mutations within the 'S' protein of the Indian severe acute respiratory syndrome coronavirus 2 mapped on the respective modelled structure (A) Side view (B) Top view.
