# Supplementary material
Source: PubMed Central journal article supplement (PMC7366529)
Supplement: IJMR-151-200_Suppl3.pdf [file IJMR-151-200_Suppl3.pdf]

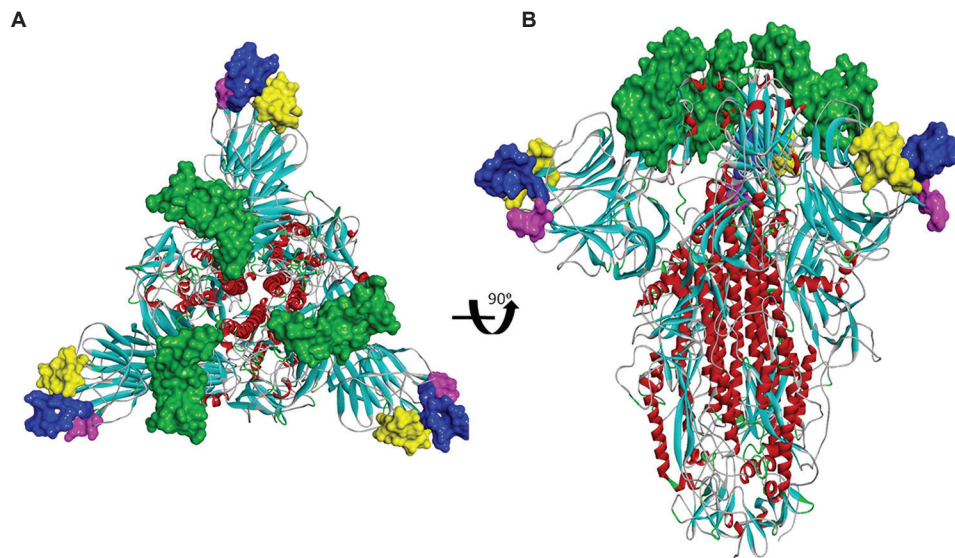

**Supplementary Fig. 2.** Conformational B-cell epitopes predicted on the S protein of the Indian severe acute respiratory syndrome coronavirus (SARS-CoV-2) using the pre-fusion structure of SARS-CoV-1 (6ACC.PDB; 87.29%) (colour key: blue - epitope 1; green - epitope 2; yellow - epitope 4; pink - epitope 5 as indicated in Supplementary Table III) (A) Top view (B) Side view.
